# Supplementary material for: HR+/HER2– Advanced Breast Cancer Treatment in the First-Line Setting: Expert Review
Source: MDPI journal article supplement (doi:10.3390/curroncol30060411), 2023-06-02
Supplement: s1 [file s1]

**Supplementary Table S1. Dose Modification for Specific Adverse Reactions Listed in at Least One CDK4/6i Product Monograph**

|                                                                                                             | Grade 1                                                                              | Grade 2                                                                                                                                                                                                                                                                                                                                                 | Grade 3                                                                                                                           | Grade 4                                                                                                                                                |
|-------------------------------------------------------------------------------------------------------------|--------------------------------------------------------------------------------------|---------------------------------------------------------------------------------------------------------------------------------------------------------------------------------------------------------------------------------------------------------------------------------------------------------------------------------------------------------|-----------------------------------------------------------------------------------------------------------------------------------|--------------------------------------------------------------------------------------------------------------------------------------------------------|
| <b>Neutropenia</b><br><br><u>ANC 1000/mm<sup>3</sup></u><br><u>&lt;LLN</u><br>No modification               |                                                                                      | <u>ANC 500/mm<sup>3</sup> – &lt;1000/mm<sup>3</sup></u><br>Interrupt until Grade ≤2 and resume at same dose<br><br><i>Recurrent or febrile neutropenia:</i><br>Interrupt until Grade ≤2 and resume at next lower dose<br>PAL: As above if Day 1 of cycle; if Day 15 of first 2 cycles, continue at current dose and adjust based on CBC repeated Day 22 | <u>ANC &lt;500/mm<sup>3</sup></u><br>Interrupt until Grade ≤2 and resume at next lower dose                                       |                                                                                                                                                        |
| <b>ALT/AST elevations without increase in total bilirubin &gt;2x ULN</b><br>No specific PAL recommendations | <u>ALT/AST</u><br><u>&gt;ULN–3x ULN</u><br>No modification                           | <u>ALT/AST &gt;3x–5x ULN</u><br>RIB: if BL <Grade 2, interrupt until recover to BL, then resume at same dose<br>If BL Grade 2, no modification<br>ABE: No modification<br><i>Recurrent:</i> Interrupt until ≤BL (ABE, RIB) or Grade 1 (ABE) and resume at next lower dose                                                                               | <u>ALT/AST &gt;5–20x ULN</u><br>Interrupt until ≤BL (ABE, RIB) or Grade 1 (ABE) and resume at next lower dose                     | <u>ALT/AST &gt;20x ULN</u><br>Discontinue                                                                                                              |
| <b>Total bilirubin &gt;2 x ULN</b><br>No specific PAL recommendations                                       |                                                                                      | <u>ALT/AST &gt;3x ULN</u><br>Discontinue                                                                                                                                                                                                                                                                                                                |                                                                                                                                   |                                                                                                                                                        |
| <b>QTcF prolongation + electrolytes</b><br>No specific PAL or ABE recommendations                           |                                                                                      | <u>QTcF &gt;480 ms or recurrent ≥481 ms</u><br>Interrupt until <481 ms then resume at next lower dose<br>Correct serum electrolytes before resuming                                                                                                                                                                                                     | <u>QTcF &gt;500 ms</u><br>Interrupt until <481 ms then resume at next lower dose<br>Correct serum electrolytes before resuming    | <u>Torsade de Pointes; polymorphic ventricular tachycardia; unexplained syncope; signs / symptoms of serious arrhythmia</u><br>Permanently discontinue |
| <b>Diarrhea</b><br>No specific RIB or PAL recommendations                                                   | <u>Increase of &lt;4 stools/day over BL</u><br>No modification                       | <u>Increase of 4–6 stools/day over BL</u><br>Does not resolve within 24 hours to ≤Grade 1: suspend until resolution; no modification<br><i>Persistent / recurrent after resuming despite maximal supportive measures:</i> suspend until ≤Grade 1; resume at next lower dose                                                                             | <u>≥7 stools/day over BL; hospitalization; life-threatening consequences</u><br>Suspend until ≤Grade 1; resume at next lower dose |                                                                                                                                                        |
| <b>ILD / pneumonitis</b>                                                                                    | <u>Grade 1 (asymptomatic)</u><br>No modification*<br>No specific PAL recommendations | <u>Grade 2 (symptomatic)</u><br>No modification<br><i>Persistent (7 days) / recurrent despite maximal supportive measures:</i> suspend until BL (ABE) or ≤Grade 1 (ABE, RIB) and resume at next lower dose <sup>†</sup><br>No specific PAL recommendations                                                                                              | <u>Grade 3 or 4 (severe)</u><br>Discontinue                                                                                       |                                                                                                                                                        |
| <b>VTE (advanced breast cancer)</b><br>No specific RIB or PAL recommendations                               | <u>Grade 1</u><br>No modification                                                    | <u>Grade 2</u><br>No modification                                                                                                                                                                                                                                                                                                                       | <u>Grade 3 or 4</u><br>Suspend dose and treat as clinically indicated; resume when patient is clinically stable                   |                                                                                                                                                        |

\*The ribociclib product monograph recommends initiating appropriate medical therapy and monitoring as clinically indicated.

---

<sup>†</sup>The ribociclib product monograph recommends performing an individualized benefit-risk assessment when considering resuming.
